## Design and Analysis of Outcomes following SARS-CoV-2 Infection in Veterans

Valerie A. Smith, DrPH<sup>1,2,3</sup>, Theodore S. Z. Berkowitz, MS<sup>1</sup>, Paul Hebert, PhD<sup>4,5</sup>, Edwin S. Wong, PhD<sup>4,5</sup>,  
Meike Niederhausen, PhD<sup>6,7,8</sup>, John A. Pura, PhD<sup>1</sup>, Kristin Berry, PhD<sup>4,12</sup>, Pamela Green, MPH PhD<sup>4</sup>,  
Anna Korpak, PhD<sup>12</sup>, Alexandra Fox, MS<sup>12</sup>, Aaron Baraff, MS<sup>12</sup>, Alex Hickok, MS<sup>6</sup>,  
Troy A Shahoumian, MPH PhD<sup>19</sup>, Amy S.B. Bohnert, PhD<sup>9,10</sup>, Denise Hynes, PhD<sup>6,11</sup>,  
Edward J. Boyko, MD MPH<sup>12</sup>, George N. Ioannou, MD<sup>4,13</sup>, Theodore J. Iwashyna, MD<sup>9,14,15</sup>,  
C. Barrett Bowling, MD<sup>1,16,17</sup>, Ann M. O'Hare, MD<sup>4,18</sup>, Matthew L. Maciejewski, Ph.D.<sup>1,2,3</sup>

<sup>1</sup> Center of Innovation to Accelerate Discovery and Practice Transformation, Durham VA Medical Center, Durham, NC

<sup>2</sup> Department of Population Health Sciences, Duke University, Durham, NC

<sup>3</sup> Division of General Internal Medicine, Department of Medicine, Duke University, Durham, NC

<sup>4</sup> Health Services Research & Development Center of Innovation for Veteran-Centered and Value-Driven Care, and Gastroenterology section, Veterans Affairs Puget Sound Health Care System, Seattle, WA

<sup>5</sup> Department of Health Systems and Population Health, University of Washington, Seattle, WA

<sup>6</sup> Center to Improve Veteran Involvement in Care, VA Portland Health Care System, Portland, OR

<sup>7</sup> Oregon Health & Science University (OHSU), Portland, OR

<sup>8</sup> Portland State University School of Public Health, Portland, OR

<sup>9</sup> VA Center for Clinical Management Research, Ann Arbor VA, Ann Arbor, MI

<sup>10</sup> Departments of Anesthesiology and Psychiatry, University of Michigan Medical School, Ann Arbor, MI

<sup>11</sup> College of Public Health and Human Sciences and Center for Quantitative Life Sciences, Oregon State University, Corvallis, OR

<sup>12</sup> Seattle Epidemiologic Research and Information Center, VA Puget Sound, Seattle, WA

<sup>13</sup> Division of Gastroenterology, University of Washington, Seattle, WA

<sup>14</sup> National Clinical Scholars Program, University of Michigan Medical School, Ann Arbor, MI

<sup>15</sup> Department of Internal Medicine, University of Michigan Medical School, Ann Arbor, MI

<sup>16</sup> Geriatric Research Education and Clinical Center, Durham VA Medical Center, Durham, NC

<sup>17</sup> Department of Medicine, Duke University, Durham, NC

<sup>18</sup> Division of Nephrology, University of Washington, Seattle, WA

<sup>19</sup> Population Health: Health Solutions, Veterans Health Administration, Washington, DC

### Corresponding Author:

Matthew L. Maciejewski, Ph.D.

Department of Population Health Sciences

Duke University Medical Center

Durham, NC 27705

Phone: (919) 286-0411 ext. 5198

e-mail: [mlm34@duke.edu](mailto:mlm34@duke.edu)

ABSTRACT: 327 WORDS

WORD COUNT: 2,896 WORDS

TABLES: 1

FIGURES: 1

APPENDICES: 1

**MAY 31, 2022**

51 **ABSTRACT**

52

53 **Background:** Understanding how SARS-CoV-2 infection impacts long-term patient outcomes  
54 requires identification of comparable persons with and without infection. We report the design  
55 and implementation of a matching strategy employed by the Department of Veterans Affairs'  
56 (VA) COVID-19 Observational Research Collaboratory (CORC) to develop comparable cohorts  
57 of SARS-CoV-2 infected and uninfected persons for the purpose of inferring potential causative  
58 long-term adverse effects of SARS-CoV-2 infection in the Veteran population.

59 **Methods:** In a retrospective cohort study, we identified VA health care system patients who  
60 were and were not infected with SARS-CoV-2 on a rolling monthly basis. We generated  
61 matched cohorts utilizing a combination of exact and time-varying propensity score matching  
62 based on electronic health record (EHR)-derived covariates that can be confounders or risk  
63 factors across a range of outcomes.

64 **Results:** From an initial pool of 126,689,864 person-months of observation, we generated final  
65 matched cohorts of 208,536 Veterans infected between March 2020-April 2021 and 3,014,091  
66 uninfected Veterans. Matched cohorts were well-balanced on all 38 covariates used in matching  
67 after excluding patients for: no VA health care utilization; implausible age, weight, or height;  
68 living outside of the 50 states or Washington, D.C.; prior SARS-CoV-2 diagnosis per Medicare  
69 claims; or lack of a suitable match. Most Veterans in the matched cohort were male (88.3%),  
70 non-Hispanic (87.1%), white (67.2%), and living in urban areas (71.5%), with a mean age of  
71 60.6, BMI of 31.3, Gagne comorbidity score of 1.4 and a mean of 2.3 CDC high-risk conditions.  
72 The most common diagnoses were hypertension (61.4%), diabetes (34.3%), major depression

73 (32.2%), coronary heart disease (28.5%), PTSD (25.5%), anxiety (22.5%), and chronic kidney  
74 disease (22.5%).

75 **Conclusions:** This successful creation of matched SARS-CoV-2 infected and uninfected patient  
76 cohorts from the largest integrated health system in the United States will support cohort studies  
77 of outcomes derived from EHRs and sample selection for qualitative interviews and patient  
78 surveys. These studies will increase our understanding of the long-term outcomes of Veterans  
79 who were infected with SARS-CoV-2.

80 **Key words:** COVID-19, Veterans, matching, study design, retrospective, causal inference,  
81 longitudinal

82  
83  
84  
85  
86  
87  
88  
89  
90  
91  
92  
93  
94  
95  
96  
97  
98  
99  
100  
101  
102  
103  
104  
105  
106  
107  
108  
109

## 110 **Background**

111           The U.S. faces continued infections with Severe Acute Respiratory Syndrome  
112 Coronavirus 2 (SARS-CoV-2) following earlier waves in 2020 and 2021. Numerous studies  
113 have examined short-term symptoms, hospitalization, and death(1, 2) among patients infected  
114 with SARS-CoV-2 both before and after vaccine availability. The coronavirus disease 2019  
115 (COVID-19) pandemic caused unprecedented disruptions across a wide range of domains  
116 relevant to health and health care including to health systems and care processes, informal family  
117 support, long-term care, safety net programs, social organizations, and economic stability,  
118 making it challenging to isolate the direct impact of infection with SARS-CoV-2 on individual  
119 health. Thus, more work is needed to characterize the direct long-term health effects of SARS-  
120 CoV-2 infection distinct from these systemic disruptions.

121           To research the long-term health consequences of COVID-19, the U.S. Department of  
122 Veterans Affairs (VA) provided resources in May 2021 to create the COVID-19 Outcomes  
123 Research Collaboratory (CORC). The main purposes of this program are investigating long-term  
124 health outcomes associated with SARS-CoV-2 infection using national electronic health record  
125 (EHR) data and survey research to assess factors not well captured by the EHR. The focus of  
126 this paper is on the study design utilized to facilitate EHR research through cohort construction  
127 of Veterans with SARS-CoV-2 infection and well-matched controls, with matching for a wide  
128 range of covariates potentially associated with the exposure (SARS-CoV-2 infection) and  
129 outcomes. The creation of these populations will enable study of outcomes associated with this  
130 infection and potential mediating factors using observational research methods applied to both  
131 retrospective EHR and prospective survey-based data.

132 To best identify potential causal associations, we selected the target trial emulation  
133 approach to evaluate the causal effect of SARS-CoV-2 infection on long-term health-related  
134 outcomes. This approach is intended to minimize sources of bias, including observed and  
135 unobserved confounding and immortal time bias in estimating the effect of SARS-CoV-2  
136 infection.(3, 4) To address unobserved confounding and selection bias, we matched Veterans  
137 infected with SARS-CoV-2 to similar contemporaneous uninfected Veterans before comparing a  
138 broad array of outcomes available in the VA's comprehensive longitudinal EHR.

139 Analyses based on the EHR will be supplemented with a prospective longitudinal survey  
140 in which a subset of matched cohorts of infected and uninfected persons will be invited to  
141 participate. Longitudinal survey responses will provide more detailed information on patient-  
142 reported outcomes that will complement outcomes ascertained from the EHR. Selection and  
143 matching of survey samples will be conducted in such a way to ensure covariate balance is  
144 maintained in the survey subsample. In addition, source data from the EHR and survey will be  
145 used to guide purposive sampling for a prospective qualitative study to understand the diversity  
146 of experiences of Veterans infected with SARS-CoV-2.

147 Designing a matched cohort study to address a wide array of EHR-based outcomes and  
148 embedded survey subsets requires a more inclusive consideration of confounding than when  
149 estimating the effect of SARS-CoV-2 infection on a single outcome. This protocol paper  
150 describes the design and methodological approach to identify a matched cohort of comparable  
151 patients infected and not infected with SARS-CoV-2. This matched cohort will be used in future  
152 research to analyze the effect of SARS-CoV-2 infection on clinical, functional, and economic  
153 outcomes among Veterans. This work could also inform and support efforts by other groups

154 interested in creating matched cohorts to address a wide range of unanswered questions related to  
155 SARS-CoV-2 infection.

156

## 157 **Methods**

### 158 *Study Design and Data*

159 We designed a retrospective cohort study of EHR-based outcomes with a non-equivalent  
160 comparator of uninfected Veterans. To facilitate measurement of patient-reported outcomes, this  
161 retrospective cohort is paired with an embedded smaller post-only survey-based prospective  
162 cohort study. In both components, comparator non-equivalence was reduced by generating  
163 matched cohorts.

164 As described previously,<sup>(5)</sup> we assembled a cohort of VA enrollees who tested positive  
165 for SARS-CoV-2 RNA in a respiratory specimen within the VA system based on polymerase  
166 chain reaction (PCR) tests as well as those with such tests performed outside the VA but  
167 documented in VA records as identified by the VA National Surveillance Tool between March  
168 1, 2020 and April 30, 2021. The earliest date of a documented positive test was taken as each  
169 patient's date of infection. We included only those Veterans who had an assigned VA primary  
170 care team (e.g., Patient Aligned Care Team) or at least one VA primary care clinic visit in the  
171 two-year period prior to infection to minimize missingness in EHR-based covariates that are  
172 generated from health system interaction. Cohorts were identified sequentially on a monthly  
173 basis, with assignment to a particular month for cases based on the date of the positive test. VA-  
174 enrolled Veterans without a positive test prior to or during the month who met the same inclusion  
175 criteria were considered uninfected potential comparators for that month. The uninfected control  
176 group members were eligible for repeated sampling and matching with replacement until they

177 had a positive test. To avoid misclassification of first infection date based on a positive test,  
178 infected Veterans with COVID-19-related diagnostic codes (ICD-10: B97.29, U07.1, J12.82,  
179 Z86.16) listed in fee-for-service Medicare claims 15 or more days before their VA test were  
180 excluded. In addition, Veterans from the uninfected comparator group with any such diagnostic  
181 codes were excluded from sampling for matching in the month the COVID-19-related code arose  
182 and any months thereafter.

183 We developed 14 separate monthly patient cohorts—one for each month (March 2020-  
184 April 2021) —for the purpose of defining index dates and matching covariates. For example, the  
185 March 2020 cohort included all VA enrollees with an initial positive test during March 2020 and  
186 all VA enrollees who were alive as of March 1, 2020 and had not been infected prior to April 1,  
187 2020. SARS-CoV-2-infected patients were included as potential comparator patients in months  
188 before infection. In a given month, uninfected Veterans could be matched to multiple infected  
189 Veterans in that same month and uninfected Veterans could be included in multiple month-  
190 specific cohorts as long as they remained uninfected and continued to meet other eligibility  
191 criteria. To minimize immortal time bias, the index date was defined as the date of the earliest  
192 positive test for SARS-CoV-2- infected Veterans and as the 1<sup>st</sup> day of the relevant month for  
193 uninfected Veterans.(6) Each patient’s index date served as the anchor for defining matching  
194 covariates (with covariate construction starting 14 days prior to the positive test date for infected  
195 patients), based on EHR data from the prior two years.

196

### 197 *Matching Specification*

198 Our goal was to conduct many-to-one matching that would maximize retention of  
199 infected patients for external validity and covariate balance for internal validity. A priori, we

200 defined a suitable matching strategy as one that would result in <5% attrition of the infected  
201 cohort and achieve covariate balance among the selected covariates for matching based on  
202 standardized differences <0.1.(7)

203 Coarsened exact matching (CEM) was initially attempted. Covariates used for matching  
204 were derived iteratively at a single point in time (summer 2021) with the understanding that the  
205 evidence base about causes and consequences of COVID-19 was (and is) evolving rapidly. In  
206 collaboration with clinician-investigators (see left column, Appendix 1), we identified a broad  
207 list of demographic, clinical, and health care utilization measures hypothesized to be either risk  
208 factors for pre-specified outcomes alone (e.g., survival, depression, total VA costs, disability,  
209 financial toxicity) or confounders associated with both infection and outcomes.(8)

210 To minimize sample loss when attempting to match on many covariates in CEM,(9) the  
211 five physician principal investigators then worked together to prioritize covariates for the final  
212 matching specification (see right column, Appendix 1). Modified coarsened exact matching was  
213 then implemented using this prioritized set of covariates. However, a suitable exact match could  
214 not be identified for 53.7% of infected Veterans, so we reverted to a form of combined exact and  
215 calendar time-specific propensity score matching,(10) with cohorts identified by index month.

216 In a two-step process, infected patients were exact matched to uninfected controls based  
217 on index month, sex, immunosuppressive medication use (binary), state of residence, and  
218 COVID-19 vaccination status (effective in January-April 2021 cohorts only) because these  
219 covariates were strong potential confounders. In the second step, a total of 38 binary,  
220 categorical, and continuous covariates were included in the propensity score model, including  
221 immunosuppressive medication use (binary), nursing home residence any time, and diagnosed  
222 CDC high-risk conditions:(11) coronary heart disease, cancer (excluding non-metastatic skin



223 cancers), chronic kidney disease, congestive heart failure, pulmonary-associated conditions  
224 (including asthma, COPD, interstitial lung disease, and cystic fibrosis), dementia, diabetes,  
225 hypertension, liver disease, sickle cell/thalassemia, solid organ or blood stem cell transplant,  
226 stroke/cerebrovascular disorders, substance use disorder, anxiety disorder, bipolar disorder,  
227 major depression, PTSD, and schizophrenia.

228 Other categorical variables in the propensity score model included sex, race, ethnicity,  
229 rurality of the Veteran's home ZIP code, state of residence, smoking status, and categorization of  
230 two comorbidity scores (CAN(12), Nosos(13)). Continuous covariates included age, body mass  
231 index (BMI), comorbidity score via Gagne index, distance from a Veteran's home to nearest VA  
232 hospital, count of CDC high-risk conditions, count of mental health conditions, and four VA  
233 utilization measures (inpatient admissions, primary care visits, specialty care visits, mental health  
234 visits in the prior 2 years).

235 A caliper of 0.2 times the pooled estimate of the standard deviation of the logit of the  
236 propensity score was used to bound which uninfected patients could be matched to each infected  
237 patient.(14) To provide the survey team a sufficiently deep pool of matched controls to account  
238 for survey non-participation, the 25 matched uninfected patients closest in propensity score were  
239 retained for each infected patient. Infected patients with fewer than 25 matched uninfected  
240 patients had all their comparator patients selected as eligible matches. Matching was performed  
241 by the PSMATCH procedure from SAS/STAT 15.1 in SAS® 9.4M6 via the VA Informatics and  
242 Computing Infrastructure (VINCI) platform.

243

244

245

## 246 *Outcomes Comparisons to be Conducted*

247           The EHR-based clinical outcomes that we intend to compare between matched cohorts  
248 are mortality, depression, suicide, onset of new clinical diagnoses, exacerbation of prevalent  
249 conditions, development of COVID-19 sequelae, health care use, and costs. The survey-based  
250 outcomes to be compared between matched cohorts include disability, financial toxicity, and  
251 health-related quality of life. For all analyses, we take a “per-protocol” approach such that  
252 uninfected patients who cross over to become infected will be censored at the time of infection.  
253 The study team discussed inclusion of negative control outcomes, but an outcome expected to be  
254 null between comparators could not be identified due to the ubiquitous effects of SARS-CoV-2  
255 infection and the conditioning of negative control outcomes on health care utilization that might  
256 be differential between comparators.

257

## 258 **Results**

259           From a sampling frame of 231,160 Veterans who had documentation of at least one  
260 SARS-CoV-2 infection between March 2020 and April 2021, and 9,291,822 Veterans without  
261 evidence of infection over the same time period, we excluded patients for missing comorbidity  
262 (CAN) score, no primary care use 24 months prior to index, missing or implausible height,  
263 weight, or age (Figure 1). We also excluded Veterans with missing ZIP codes or ZIP codes  
264 outside of Washington, D.C. or the 50 states, patients who were uninfected on the 1<sup>st</sup> of each  
265 month but became infected later in the same month (for the uninfected group), or had a prior  
266 infection documented in Medicare. Lastly, we excluded 776 (0.4%) of 209,312 infected patients  
267 who did not have a suitable match, which generated final matched cohorts of 208,536 infected

268 and 3,014,091 uninfected Veterans (comprising 5,173,400 total person-months of follow-up  
269 because of matching with replacement).

270 The matched cohorts were well-balanced on all covariates, based on standardized mean  
271 differences (SMD) <0.1 (Table 1). The cohorts included Veterans from all 50 states and  
272 Washington, D.C. Most Veterans in the matched cohorts were male (88.3%), non-Hispanic  
273 (87.1%), white (67.2%), and living in urban areas (71.5%), with a mean (standard deviation, SD)  
274 age of 60.6 (16.4), BMI of 31.3 (6.6), and mean (SD) straight-line distance to the closest VA  
275 medical center of 35.8 (35.2) miles. A minority were current smokers (12.6%), 39.3% had never  
276 smoked and 42.5% were former smokers. Comorbidity was assessed several ways, including  
277 Gagne score (mean=1.4, SD=2.2), count of CDC high-risk conditions (mean=2.3, SD=1.9) and  
278 count of 5 mental health conditions prevalent in Veterans (mean=0.9, SD=1.0). The most  
279 common diagnoses were hypertension (61.4%), diabetes (34.3%), major depression (32.2%),  
280 coronary heart disease (28.5%), PTSD (25.5%), anxiety (22.5%), and chronic kidney disease  
281 (22.5%). Approximately 10% of matched cohort members had been prescribed one or more  
282 immunosuppressive medications within 24 months before the index date. Of the 34.0% of the  
283 cohort with index dates between January-April 2021 when vaccinations became available,  
284 70,985 Veterans (1.5% of the entire infected cohort) received at least one dose of a vaccine  
285 before their first positive COVID-19 test result.

286 In the 24 months prior to the index date, cohort members had a mean (SD) of 8.3 (10.2)  
287 primary care visits, 13.4 (14.9) specialty care visits, and 7.8 (21.9) mental health visits in VA.  
288 Over one-half (53.3%) of infected patients were drawn from three of the 14 months in the  
289 observation period (November 2020, December 2020, and January 2021).

290

## 291 **Discussion**

292           Despite the very large sample size available for this research with 231,160 infected and  
293 just over 9 million uninfected Veterans, a strategy of bias reduction based on coarsened exact  
294 matching on resulted in lack of an exact match for 53.7% of cases. The large sample loss reduced  
295 statistical power and generalizability since the exposure-disease associations may have differed  
296 between successfully matched and unmatched populations. The combined exact matching and  
297 propensity score approach, on the other hand, resulted in a much lower failure to match  
298 frequency at only 0.4%, with a high rate of success as assessed by the SMDs < 0.1 for all  
299 matching covariates. The work performed by the CORC to identify important covariates on  
300 which to and match cases and uninfected controls using propensity score methodology should  
301 facilitate the performance of causal research on long COVID-19 etiology in this population.  
302 Matched cohorts will be updated from May 2021 forward to be able to generate evidence on  
303 Veteran experience after April 2021.

304           As the nation's largest national integrated publicly financed health system, the VA has  
305 the unique ability to track long-term outcomes among individuals infected with SARS-CoV-2  
306 because it has a well-established comprehensive EHR that was developed around the mission of  
307 providing lifelong care for Veterans. In addition, Veterans are historically reliant on VA for care  
308 if they engage with the health system.

309           Our matching strategy defines the specific effect that will be estimated from our results.  
310 We considered historical controls of Veterans receiving care in the VA before the pandemic, but  
311 that would estimate the effect of individual SARS-CoV-2 infection combined with all the many  
312 other social and systematic disruptions that accompanied the pandemic. We also considered  
313 comparing Veterans hospitalized with SARS-CoV-2 infection to Veterans hospitalized with

314 other conditions (e.g., influenza), which would be analogous to a randomized clinical trial with  
315 an active comparator. Such a comparator group asks whether COVID-19 hospitalization is  
316 worse than other sorts of hospitalizations. We reasoned that, for most Veterans, had they not  
317 developed COVID-19, they may not have been hospitalized with another condition that same  
318 month (although we did not exclude those hospitalized, so they do occur at whatever their natural  
319 frequency is in the comparator group).

320 We also did not wish to restrict to only hospitalized COVID-19 patients, as we took as a  
321 scientific question the relationship between initial severity of SARS-CoV-2 infection and  
322 subsequent outcomes—rather than presuming it by conditioning on initial severity. We also  
323 considered Veterans infected with other non-SARS-CoV-2 viruses. However, we noted the  
324 substantial body of evidence on sepsis and pneumonia—much of it viral in origin—that  
325 suggested such patients also have adverse long-term outcomes caused by non-SARS-CoV-2  
326 viruses, including influenza. As such, we reasoned such comparators might underestimate the  
327 total individual effects survivors of COVID-19 would face and health systems would need to  
328 support. Each of these comparators may be of great interest to other research groups; they were  
329 not, however, our primary focus. Our goal was to generate matched cohorts to support cohort  
330 studies of EHR-derived outcomes and sample selection for qualitative interviews and patient  
331 surveys.

332 The retrospective cohort study described here is subject to several limitations. First,  
333 cohort matching results in sample loss that may reduce generalizability of results compared to  
334 weighting methods, although we were able to retain >99% of the infected patients in the sample  
335 after matching. Second, there is likely some contamination of the uninfected comparator group  
336 with Veterans with undiagnosed SARS-CoV-2 infection or who tested positive for SARS-CoV-2

337 with test results not available from private insurers, Medicare Advantage plans, Medicaid, or  
338 other community sources. Third, covariate specification for matching is based on our  
339 understanding of risk factors and confounders of SARS-CoV-2 infection as of spring 2022.  
340 Fourth, results may not generalize to Veterans who became infected after April 2021 or to non-  
341 Veterans. CORC will update matched cohorts from May 2021-March 2022, but that work is  
342 ongoing.

343

## 344 **Conclusions**

345 Our understanding of the long-term outcomes of Veterans who were infected with SARS-  
346 CoV-2 will be gleaned from qualitative interviews, population-based surveys, and cohort studies  
347 of outcomes derived from EHRs. This study will explore all these approaches, all framed in the  
348 context of the matched cohorts generated from EHR data from the largest integrated health  
349 system in the U.S. Due to Veterans' reliance on VA for care and eligibility for care once  
350 enrolled, we will be able to evaluate clinical and economic outcomes following their acute  
351 SARS-CoV-2 infection, as long-term outcomes two years after the onset of the pandemic are  
352 now being realized.

353

## 354 **ABBREVIATIONS:**

355 CAN: Care Assessment Need; CDC: Centers for Disease Control and Prevention; COPD:  
356 chronic obstructive pulmonary disease; CAD: coronary heart disease; HIV: human  
357 immunodeficiency virus; CKD: chronic kidney disease; CHF: congestive heart failure; SUD:  
358 substance use disorder; SMI: serious mental illness; PTSD: post-traumatic stress disorder; VA:  
359 Veterans Health Administration; CBOC: VA community-based outpatient clinic.

360 **DECLARATIONS**

361 **Ethics approval and consent to participate:** Initial and continuing reviews approved by were  
362 reviewed and approved by the Durham Veterans Affairs Institutional Review Board and  
363 Research and Development Committee. All methods were carried out in accordance with  
364 relevant guidelines and regulations. No informed consent was obtained because the project is  
365 secondary analysis of data. The Durham VA Institutional Review Board granted waivers for  
366 informed consent, HIPAA information, and HIPAA research on decedents.

367 **Consent for publication:** Not applicable.

368 **Availability of data and materials:** The datasets generated and/or analyzed during the current  
369 study are not publicly available due to Department of Veterans Affairs data restrictions  
370 prohibiting sharing. Contact the corresponding, Dr. Matthew Maciejewski, for data requests.

371 Matthew L. Maciejewski, Ph.D.  
372 Department of Population Health Sciences  
373 Duke University Medical Center  
374 Durham, NC 27705  
375 Phone: (919) 286-0411 ext. 5198  
376 e-mail: [mlm34@duke.edu](mailto:mlm34@duke.edu)  
377

378 **Competing interests:** The authors declare that they have no competing interests.

379 **Funding/Support:** The study was supported by the U.S. Department of Veterans Affairs  
380 HSR&D grant C19 21-278 and C19 21-279. MM was also supported by a senior Research  
381 Career Scientist award from the Department of Veterans Affairs (RCS 10-391 to M.M. and RCS  
382 21-136 to D.H.) and by the Durham VA Center of Innovation to Accelerate Discovery and  
383 Practice Transformation (CIN 13-410).

384 **Authors' contributions:** Conception: VAS, TSZB, PH, ESW, MN, JAP, KB, ASB, DH, EJB,  
385 GNI, TJI, CBB, AMO, MLM.

386 Design of the work: VAS, TSZB, PH, ESW, MN, JAP, ASB, DH, EJB, GNI, TJI, CBB, AMO,

387 MLM.

388 Data acquisition: TSZB, KB, PG, AK, AF, AB, AH, TAS, GNI.

389 Analysis: VAS, TSZB, KB, MLM

390 Interpretation of data: VAS, TSZB, PH, MN, JAP, KB, ASB, DH, EJB, GNI, TJI, CBB, AMO,

391 MLM

392 Drafted work: VAS, TSZB, MLM

393 Substantive revision: VAS, TSZB, PH, ESW, MN, JAP, KB, PG, AK, AF, AB, AH, TAS, ASB,

394 DH, EJB, GNI, TJI, CBB, AMO, MLM

395 **Role of the Sponsor:** The Health Services Research and Development Service, Department of

396 Veterans Affairs had no role in the design, conduct, collection, management, analysis, or

397 interpretation of the data; or in the preparation, review, or approval of the manuscript. The

398 opinions expressed are those of the authors and not necessarily those of the Department of

399 Veterans Affairs, the United States Government, Duke University, the University of Washington,

400 the University of Michigan, Oregon Health & Science University (OHSU), Portland State

401 University, and Oregon State University.



402 **REFERENCES**

- 403 1. Al-Aly Z, Xie Y, Bowe B. High-dimensional characterization of post-acute sequelae of  
404 COVID-19. *Nature*. 2021;594(7862):259-64.
- 405 2. Groff D, Sun A, Ssentongo AE, Ba DM, Parsons N, Poudel GR, et al. Short-term and  
406 Long-term Rates of Postacute Sequelae of SARS-CoV-2 Infection: A Systematic Review. *JAMA*  
407 *Netw Open*. 2021;4(10):e2128568.
- 408 3. Hernan MA, Alonso A, Logan R, Grodstein F, Michels KB, Willett WC, et al.  
409 Observational studies analyzed like randomized experiments: an application to postmenopausal  
410 hormone therapy and coronary heart disease. *Epidemiology*. 2008;19(6):766-79.
- 411 4. Hernan MA, Robins JM. Using Big Data to Emulate a Target Trial When a Randomized  
412 Trial Is Not Available. *Am J Epidemiol*. 2016;183(8):758-64.
- 413 5. Ioannou GN, Ferguson JM, O'Hare AM, Bohnert ASB, Backus LI, Boyko EJ, et al.  
414 Changes in the associations of race and rurality with SARS-CoV-2 infection, mortality, and case  
415 fatality in the United States from February 2020 to March 2021: A population-based cohort  
416 study. *PLoS Med*. 2021;18(10):e1003807.
- 417 6. Suissa S. Immortal time bias in pharmaco-epidemiology. *Am J Epidemiol*.  
418 2008;167(4):492-9.
- 419 7. Austin PC. A Tutorial and Case Study in Propensity Score Analysis: An Application to  
420 Estimating the Effect of In-Hospital Smoking Cessation Counseling on Mortality. *Multivariate*  
421 *Behav Res*. 2011;46(1):119-51.
- 422 8. Brookhart MA, Schneeweiss S, Rothman KJ, Glynn RJ, Avorn J, Sturmer T. Variable  
423 selection for propensity score models. *Am J Epidemiol*. 2006;163(12):1149-56.

- 424 9. Ripollone JE, Huybrechts KF, Rothman KJ, Ferguson RE, Franklin JM. Evaluating the  
425 Utility of Coarsened Exact Matching for Pharmacoepidemiology Using Real and Simulated  
426 Claims Data. *Am J Epidemiol*. 2020;189(6):613-22.
- 427 10. Mack CD, Glynn RJ, Brookhart MA, Carpenter WR, Meyer AM, Sandler RS, et al.  
428 Calendar time-specific propensity scores and comparative effectiveness research for stage III  
429 colon cancer chemotherapy. *Pharmacoepidemiol Drug Saf*. 2013;22(8):810-8.
- 430 11. Prevention CfDca. Underlying Medical Conditions Associated with Higher Risk for  
431 Severe COVID-19: Information for Healthcare Professionals Atlanta, GA: Centers for Disease  
432 Control and Prevention; 2022 [Available from: [https://www.cdc.gov/coronavirus/2019-](https://www.cdc.gov/coronavirus/2019-ncov/hcp/clinical-care/underlyingconditions.html)  
433 [ncov/hcp/clinical-care/underlyingconditions.html](https://www.cdc.gov/coronavirus/2019-ncov/hcp/clinical-care/underlyingconditions.html)].
- 434 12. Wang L, Porter B, Maynard C, Evans G, Bryson C, Sun H, et al. Predicting risk of  
435 hospitalization or death among patients receiving primary care in the Veterans Health  
436 Administration. *Med Care*. 2013;51(4):368-73.
- 437 13. Wagner TH, Upadhyay A, Cowgill E, Stefos T, Moran E, Asch SM, et al. Risk  
438 Adjustment Tools for Learning Health Systems: A Comparison of DxCG and CMS-HCC V21.  
439 *Health Serv Res*. 2016;51(5):2002-19.
- 440 14. Austin PC. Optimal caliper widths for propensity-score matching when estimating  
441 differences in means and differences in proportions in observational studies. *Pharm Stat*.  
442 2011;10(2):150-61.
- 443

**Table 1. Descriptive Statistics of Matched Cohorts**

| <i>Variable Name</i>                      | <i>COVID-19</i><br>(n=208,536) | <i>Uninfected</i><br>(n=5,173,400) | <i>SMD</i> |
|-------------------------------------------|--------------------------------|------------------------------------|------------|
| <b>Age, mean (SD)</b>                     | 60.6 (16.2)                    | 60.6 (16.4)                        | 0.00106    |
| <b>BMI, mean (SD)</b>                     | 31.3 (6.4)                     | 31.3 (6.6)                         | 0.01178    |
| <b>Sex, N (%)</b>                         |                                |                                    |            |
| Female                                    | 21,949 (10.5)                  | 540,127 (10.4)                     | 0.00988    |
| Male                                      | 183,676 (88.1)                 | 4,566,632 (88.3)                   |            |
| Unknown                                   | 2,911 (1.4)                    | 66,641 (1.3)                       |            |
| <b>Race, N (%)</b>                        |                                |                                    |            |
| American Indian/Alaska Native             | 1,965 (0.9)                    | 47,784 (0.9)                       | 0.00610    |
| Asian                                     | 2,081 (1.0)                    | 51,718 (1.0)                       |            |
| Black or African American                 | 47,726 (22.9)                  | 1,189,212 (23.0)                   |            |
| Native Hawaiian or Other Pacific Islander | 1,946 (0.9)                    | 48,095 (0.9)                       |            |
| White                                     | 139,952 (67.1)                 | 3,474,658 (67.2)                   |            |
| Multiple Races                            | 1,978 (0.9)                    | 49,028 (0.9)                       |            |
| Missing                                   | 12,888 (6.2)                   | 312,905 (6.0)                      |            |
| <b>Hispanic Ethnicity, N (%)</b>          |                                |                                    |            |
| Yes                                       | 20,309 (9.7)                   | 492,607 (9.5)                      | 0.00792    |
| No                                        | 181,097 (86.8)                 | 4,506,252 (87.1)                   |            |
| Missing                                   | 7,130 (3.4)                    | 174,541 (3.4)                      |            |
| <b>Rurality, N (%)</b>                    |                                |                                    |            |
| Urban                                     | 149,310 (71.6)                 | 3,700,754 (71.5)                   | 0.00144    |
| Not Urban (incl. missing)                 | 59,226 (28.4)                  | 1,472,646 (28.5)                   |            |
| <b>Smoking Status, N (%)</b>              |                                |                                    |            |
| Current                                   | 26,188 (12.6)                  | 654,415 (12.6)                     | 0.01379    |
| Former                                    | 88,275 (42.3)                  | 2,201,135 (42.5)                   |            |
| Never                                     | 81,916 (39.3)                  | 2,032,442 (39.3)                   |            |
| Missing                                   | 12,157 (5.8)                   | 285,408 (5.5)                      |            |
| <b>CDC High Risk Conditions, N (%)</b>    |                                |                                    |            |
| Coronary Heart Disease                    | 59,972 (28.8)                  | 1,472,173 (28.5)                   | 0.00668    |
| Cancer                                    | 38,136 (18.3)                  | 942,791 (18.2)                     | 0.00165    |
| Chronic Kidney Disease                    | 47,610 (22.8)                  | 1,161,200 (22.4)                   | 0.00920    |
| Congestive Heart Failure                  | 22,124 (10.6)                  | 532,106 (10.3)                     | 0.01059    |
| Pulmonary                                 | 46,178 (22.1)                  | 1,131,201 (21.9)                   | 0.00671    |
| Dementia                                  | 10,837 (5.2)                   | 254,136 (4.9)                      | 0.01298    |
| Diabetes                                  | 72,020 (34.5)                  | 1,773,699 (34.3)                   | 0.00528    |
| Hypertension                              | 127,761 (61.3)                 | 3,174,235 (61.4)                   | 0.00187    |

|                                                                                                                 |               |                  |         |
|-----------------------------------------------------------------------------------------------------------------|---------------|------------------|---------|
| Liver Disease                                                                                                   | 15,324 (7.3)  | 370,974 (7.2)    | 0.00684 |
| Sickle Cell                                                                                                     | 383 (0.2)     | 9,131 (0.2)      | 0.00169 |
| Transplant                                                                                                      | 687 (0.3)     | 16,864 (0.3)     | 0.00061 |
| Stroke/Cerebrovascular disease                                                                                  | 13,012 (6.2)  | 314,234 (6.1)    | 0.00689 |
| Substance Use Disorder                                                                                          | 25,915 (12.4) | 645,302 (12.5)   | 0.00140 |
| Anxiety                                                                                                         | 47,186 (22.6) | 1,165,628 (22.5) | 0.00230 |
| Bipolar disorder                                                                                                | 8,039 (3.9)   | 199,388 (3.9)    | 0.00005 |
| Major Depression                                                                                                | 67,383 (32.3) | 1,664,825 (32.2) | 0.00282 |
| PTSD                                                                                                            | 52,964 (25.4) | 1,317,278 (25.5) | 0.00148 |
| Schizophrenia                                                                                                   | 4,737 (2.3)   | 115,145 (2.2)    | 0.00309 |
| <b># CDC High Risk Conditions, mean (SD)</b>                                                                    | 2.3 (1.9)     | 2.3 (1.9)        | 0.01088 |
| <b># Mental Health Conditions (Anxiety, Bipolar disorder, major depression, PTSD, schizophrenia), mean (SD)</b> | 0.9 (1.1)     | 0.9 (1.0)        | 0.00200 |
| <b>Gagne score, mean (SD)</b>                                                                                   | 1.4 (2.3)     | 1.4 (2.2)        | 0.01559 |
| <b># VA Inpatient Admissions, mean (SD)</b>                                                                     | 0.4 (1.2)     | 0.4 (1.3)        | 0.00079 |
| <b># VA Primary Care Visits, mean (SD)</b>                                                                      | 8.6 (9.7)     | 8.3 (10.2)       | 0.02916 |
| <b># VA Specialty Care Visits, mean (SD)</b>                                                                    | 13.9 (14.1)   | 13.4 (14.9)      | 0.03288 |
| <b>Mental Health Care Utilization, mean (SD)</b>                                                                | 7.9 (22.6)    | 7.8 (21.9)       | 0.00457 |
| <b>Immunosuppressed in prior 24 months, N (%)</b>                                                               | 20,366 (9.8)  | 502,358 (9.7)    | 0.00188 |
| <b>CLC At Index Date, N (%)</b>                                                                                 | 2,176 (1.0)   | 46,586 (0.9)     | 0.01457 |
| <b>NOSOS score, N (%)</b>                                                                                       |               |                  |         |
| NOSOS, missing                                                                                                  | 4,801 (2.3)   | 110,729 (2.1)    | 0.03224 |
| NOSOS Category 1 [0, 0.417)                                                                                     | 5,708 (2.7)   | 129,206 (2.5)    |         |
| NOSOS Category 2 [0.417, 0.471)                                                                                 | 9,599 (4.6)   | 227,788 (4.4)    |         |
| NOSOS Category 3 [0.471, 0.534)                                                                                 | 12,449 (6.0)  | 305,685 (5.9)    |         |
| NOSOS Category 4 [0.534, 0.611)                                                                                 | 15,187 (7.3)  | 378,825 (7.3)    |         |
| NOSOS Category 5 [0.611, 0.707)                                                                                 | 17,737 (8.5)  | 450,045 (8.7)    |         |
| NOSOS Category 6 [0.707, 0.829)                                                                                 | 20,556 (9.9)  | 525,057 (10.1)   |         |
| NOSOS Category 7 [0.829, 0.998)                                                                                 | 23,462 (11.3) | 599,981 (11.6)   |         |
| NOSOS Category 8 [0.998, 1.259)                                                                                 | 26,956 (12.9) | 686,219 (13.3)   |         |
| NOSOS Category 9 [1.259, 1.805)                                                                                 | 31,372 (15.0) | 786,826 (15.2)   |         |
| NOSOS Category 10 [1.805, Inf)                                                                                  | 40,709 (19.5) | 973,039 (18.8)   |         |
| <b>CAN Score, N (%)</b>                                                                                         |               |                  |         |
| CAN, missing                                                                                                    | 4,066 (1.9)   | 86,041 (1.7)     | 0.03258 |
| CAN Category 1, 0 – 20                                                                                          | 34,427 (16.5) | 851,737 (16.5)   |         |
| CAN Category 2, 25 – 40                                                                                         | 31,926 (15.3) | 801,677 (15.5)   |         |
| CAN Category 3, 45 – 60                                                                                         | 38,266 (18.3) | 970,378 (18.8)   |         |
| CAN Category 4, 65 – 80                                                                                         | 46,894 (22.5) | 1,184,134 (22.9) |         |

|                                                |               |                  |         |
|------------------------------------------------|---------------|------------------|---------|
| CAN Category 5, 85 – 90                        | 30,745 (14.7) | 762,537 (14.7)   |         |
| CAN Category 6, 95 – 99                        | 22,212 (10.7) | 516,896 (10.0)   |         |
| <b>Vaccinated in January-April 2021, N (%)</b> | 3,153 (1.5)   | 75,353 (1.5)     | 0.00470 |
| <b>Index Month, N (%)</b>                      |               |                  |         |
| March 2020                                     | 2,340 (1.1)   | 58,278 (1.1)     | 0.00363 |
| April 2020                                     | 6,786 (3.3)   | 168,727 (3.3)    |         |
| May 2020                                       | 4,402 (2.1)   | 109,604 (2.1)    |         |
| June 2020                                      | 6,967 (3.3)   | 173,776 (3.4)    |         |
| July 2020                                      | 14,945 (7.2)  | 373,025 (7.2)    |         |
| August 2020                                    | 8,376 (4.0)   | 208,750 (4.0)    |         |
| September 2020                                 | 6,787 (3.3)   | 169,048 (3.3)    |         |
| October 2020                                   | 12,212 (5.9)  | 302,119 (5.8)    |         |
| November 2020                                  | 31,004 (14.9) | 767,646 (14.8)   |         |
| December 2020                                  | 43,732 (21.0) | 1,085,816 (21.0) |         |
| January 2021                                   | 36,282 (17.4) | 900,381 (17.4)   |         |
| February 2021                                  | 15,699 (7.5)  | 388,553 (7.5)    |         |
| March 2021                                     | 9,942 (4.8)   | 244,839 (4.7)    |         |
| April 2021                                     | 9,062 (4.3)   | 222,838 (4.3)    |         |
| <b>U.S. State of Residence, N (%)</b>          |               |                  |         |
| Alaska                                         | 694 (0.3)     | 16,880 (0.3)     | 0.01515 |
| Alabama                                        | 4,089 (2.0)   | 101,648 (2.0)    |         |
| Arkansas                                       | 3,075 (1.5)   | 76,426 (1.5)     |         |
| Arizona                                        | 6,310 (3.0)   | 157,105 (3.0)    |         |
| California                                     | 16,253 (7.8)  | 405,136 (7.8)    |         |
| Colorado                                       | 3,278 (1.6)   | 80,733 (1.6)     |         |
| Connecticut                                    | 1,895 (0.9)   | 46,782 (0.9)     |         |
| Washington, D.C.                               | 414 (0.2)     | 10,111 (0.2)     |         |
| Delaware                                       | 552 (0.3)     | 13,199 (0.3)     |         |
| Florida                                        | 16,003 (7.7)  | 399,175 (7.7)    |         |
| Georgia                                        | 7,893 (3.8)   | 196,375 (3.8)    |         |
| Hawaii                                         | 263 (0.1)     | 6,295 (0.1)      |         |
| Iowa                                           | 2,473 (1.2)   | 59,479 (1.1)     |         |
| Idaho                                          | 1,582 (0.8)   | 39,124 (0.8)     |         |
| Illinois                                       | 6,462 (3.1)   | 159,840 (3.1)    |         |
| Indiana                                        | 4,533 (2.2)   | 112,806 (2.2)    |         |
| Kansas                                         | 2,471 (1.2)   | 61,282 (1.2)     |         |
| Kentucky                                       | 3,352 (1.6)   | 82,956 (1.6)     |         |
| Louisiana                                      | 3,754 (1.8)   | 93,423 (1.8)     |         |
| Massachusetts                                  | 2,990 (1.4)   | 73,840 (1.4)     |         |

|                                                    |                    |                    |                |
|----------------------------------------------------|--------------------|--------------------|----------------|
| Maryland                                           | 2,640 (1.3)        | 65,047 (1.3)       |                |
| Maine                                              | 631 (0.3)          | 15,442 (0.3)       |                |
| Michigan                                           | 4,383 (2.1)        | 108,714 (2.1)      |                |
| Minnesota                                          | 4,251 (2.0)        | 105,503 (2.0)      |                |
| Missouri                                           | 6,609 (3.2)        | 164,281 (3.2)      |                |
| Mississippi                                        | 1,804 (0.9)        | 44,823 (0.9)       |                |
| Montana                                            | 1,122 (0.5)        | 27,824 (0.5)       |                |
| North Carolina                                     | 8,521 (4.1)        | 212,232 (4.1)      |                |
| North Dakota                                       | 865 (0.4)          | 21,154 (0.4)       |                |
| Nebraska                                           | 1,872 (0.9)        | 46,270 (0.9)       |                |
| New Hampshire                                      | 743 (0.4)          | 18,024 (0.3)       |                |
| New Jersey                                         | 2,623 (1.3)        | 64,850 (1.3)       |                |
| New Mexico                                         | 1,373 (0.7)        | 34,024 (0.7)       |                |
| Nevada                                             | 3,049 (1.5)        | 75,467 (1.5)       |                |
| New York                                           | 7,739 (3.7)        | 192,659 (3.7)      |                |
| Ohio                                               | 9,173 (4.4)        | 228,564 (4.4)      |                |
| Oklahoma                                           | 4,030 (1.9)        | 100,147 (1.9)      |                |
| Oregon                                             | 1,386 (0.7)        | 34,259 (0.7)       |                |
| Pennsylvania                                       | 7,880 (3.8)        | 196,104 (3.8)      |                |
| Rhode Island                                       | 762 (0.4)          | 18,729 (0.4)       |                |
| South Carolina                                     | 6,352 (3.0)        | 157,970 (3.1)      |                |
| South Dakota                                       | 1,408 (0.7)        | 29,278 (0.6)       |                |
| Tennessee                                          | 5,848 (2.8)        | 145,295 (2.8)      |                |
| Texas                                              | 19,436 (9.3)       | 485,224 (9.4)      |                |
| Utah                                               | 1,243 (0.6)        | 30,706 (0.6)       |                |
| Virginia                                           | 5,070 (2.4)        | 125,759 (2.4)      |                |
| Vermont                                            | 149 (0.1)          | 3,594 (0.1)        |                |
| Washington                                         | 1,976 (0.9)        | 48,855 (0.9)       |                |
| Wisconsin                                          | 5,087 (2.4)        | 126,171 (2.4)      |                |
| West Virginia                                      | 1,621 (0.8)        | 40,213 (0.8)       |                |
| Wyoming                                            | 554 (0.3)          | 13,603 (0.3)       |                |
| <b>Distance to Nearest VAMC (miles), mean (SD)</b> | <b>35.6 (36.5)</b> | <b>35.8 (35.1)</b> | <b>0.00452</b> |

Note: The uninfected cohort represents 3,014,091 unique Veterans with a total of 5,173,400 person-months since they were matched with replacement.

**Figure 1. STROBE Figure of Cohort Derivation**

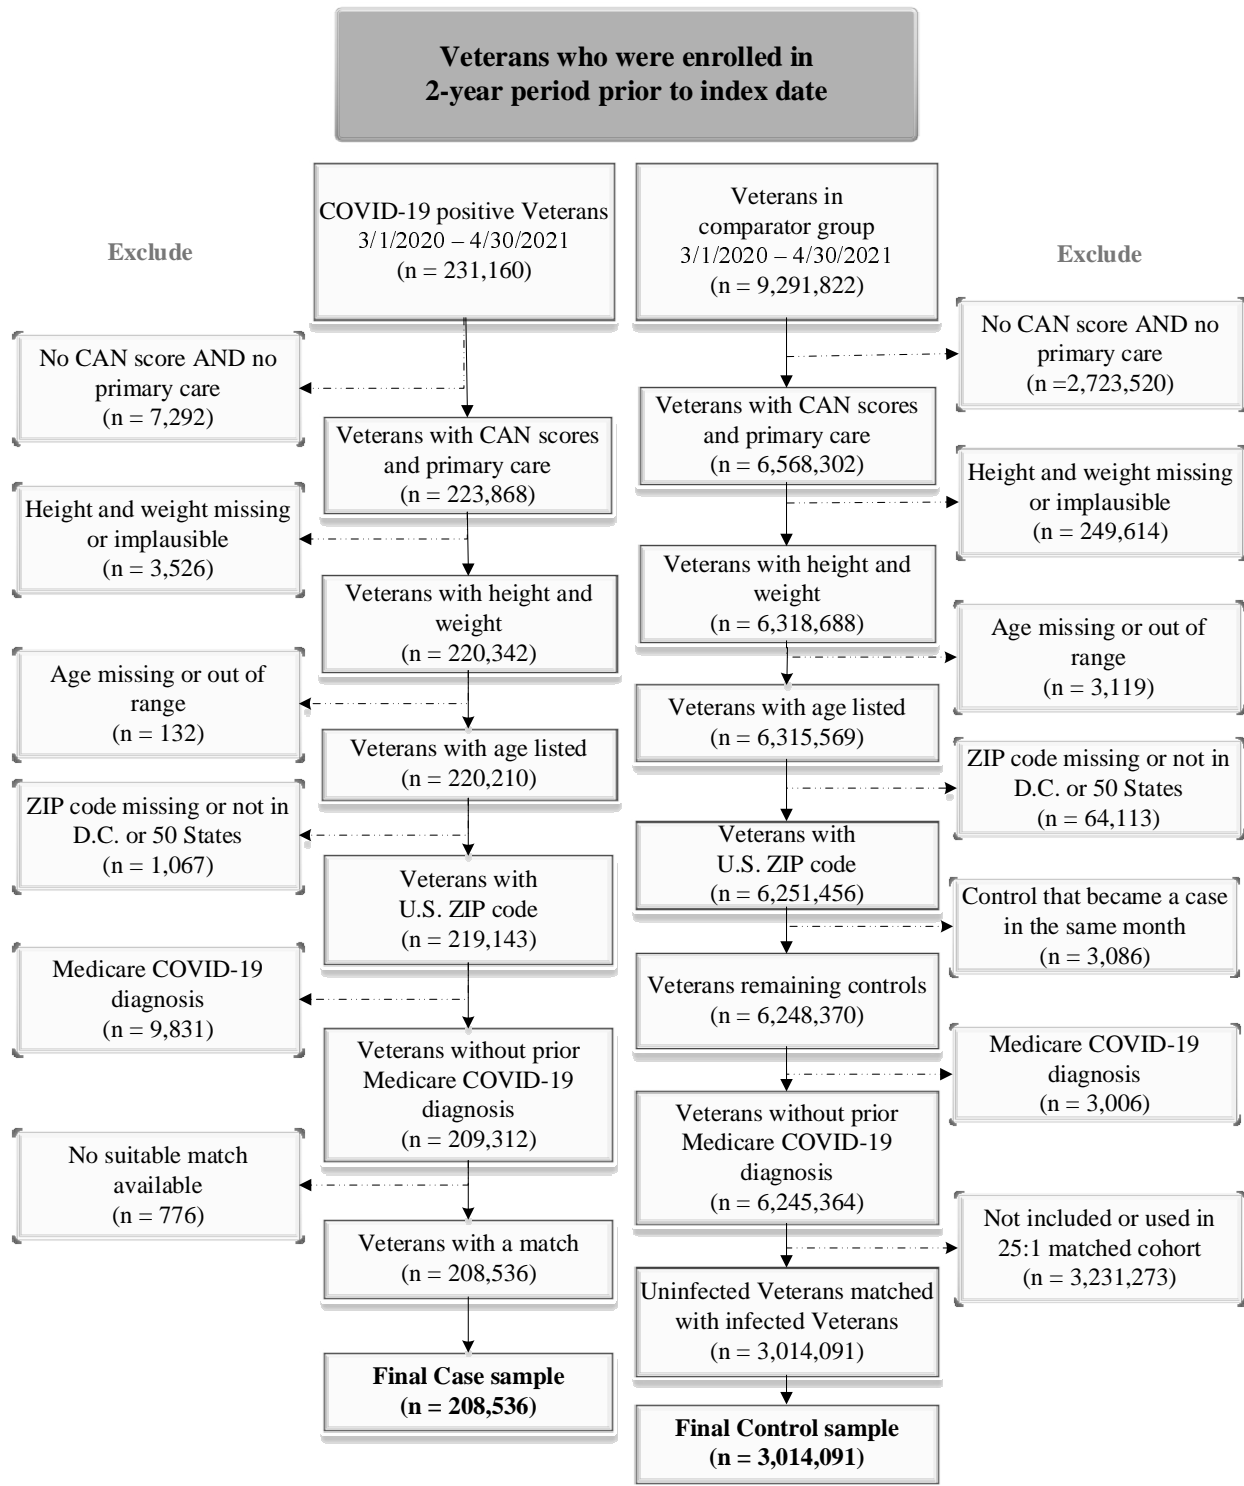

## Appendix 1. Original and Final List of Covariates for Matching

| <i>Original Covariate List</i>                                                                          | <i>Final Matching Specification Used</i>                                                                |
|---------------------------------------------------------------------------------------------------------|---------------------------------------------------------------------------------------------------------|
| Sex                                                                                                     | Sex                                                                                                     |
| Use of immunosuppressive medication                                                                     | Use of immunosuppressive medication                                                                     |
| Age                                                                                                     | Age                                                                                                     |
| Race                                                                                                    | Race                                                                                                    |
| Ethnicity                                                                                               | Ethnicity                                                                                               |
| CAN comorbidity score                                                                                   | CAN comorbidity score (7 categories)                                                                    |
| Nosos comorbidity score                                                                                 | Nosos comorbidity score (11 categories)                                                                 |
| Gagne comorbidity score indicators                                                                      | Gagne comorbidity score                                                                                 |
| Indicator of CDC high-risk conditions (Cancer other than non-metastatic skin cancer)                    | Indicator of CDC high-risk conditions (Cancer other than non-metastatic skin cancer)                    |
| Indicator of CDC high-risk conditions (COPD/asthma/interstitial lung disease/cystic fibrosis/pulmonary) | Indicator of CDC high-risk conditions (COPD/asthma/interstitial lung disease/cystic fibrosis/pulmonary) |
| Indicator of CDC high-risk conditions (hypertension)                                                    | Indicator of CDC high-risk conditions (hypertension)                                                    |
| Indicator of CDC high-risk conditions (diabetes)                                                        | Indicator of CDC high-risk conditions (diabetes)                                                        |
| Indicator of CDC high-risk conditions (Dementia)                                                        | Indicator of CDC high-risk conditions (Dementia)                                                        |
| Indicator of CDC high-risk conditions (CAD)                                                             | Indicator of CDC high-risk conditions (CAD)                                                             |
| Indicator of CDC high-risk conditions (HIV)                                                             |                                                                                                         |
| Indicator of CDC high-risk conditions (Liver disease)                                                   | Indicator of CDC high-risk conditions (Liver disease)                                                   |
| Indicator of CDC high-risk conditions (Pregnancy)                                                       | Indicator of CDC high-risk conditions (Pregnancy) <sup>1</sup>                                          |
| Indicator of CDC high-risk conditions (Sickle cell/thalassemia)                                         | Indicator of CDC high-risk conditions (Sickle cell/thalassemia)                                         |
| Indicator of CDC high-risk conditions (Smoking)                                                         | Smoking status (4 categories)                                                                           |
| Indicator of CDC high-risk conditions (Solid organ or blood stem cell transplant)                       | Indicator of CDC high-risk conditions (Solid organ or blood stem cell transplant)                       |
| Indicator of CDC high-risk conditions (Stroke or cerebrovascular disease)                               | Indicator of CDC high-risk conditions (Stroke or cerebrovascular disease)                               |
| Indicator of CDC high-risk conditions (CKD)                                                             | Indicator of CDC high-risk conditions (CKD)                                                             |
| Indicator of CDC high-risk conditions (CHF)                                                             | Indicator of CDC high-risk conditions (CHF)                                                             |
| Indicator of CDC high-risk conditions (SUD)                                                             | Indicator of CDC high-risk conditions (SUD)                                                             |
|                                                                                                         | Count of CDC high-risk conditions                                                                       |
| SMI Diagnosis                                                                                           |                                                                                                         |
| Anxiety Diagnosis                                                                                       | Anxiety Diagnosis                                                                                       |
| PTSD Diagnosis                                                                                          | PTSD Diagnosis                                                                                          |
| Bipolar Diagnosis                                                                                       | Bipolar Diagnosis                                                                                       |
| Schizophrenia Diagnosis                                                                                 | Schizophrenia Diagnosis                                                                                 |
|                                                                                                         | Major depression Diagnosis                                                                              |
|                                                                                                         | Count of mental health conditions                                                                       |
| Body Mass Index (BMI)                                                                                   | Body Mass Index (BMI)                                                                                   |
| Community Living Center resident                                                                        | Community Living Center resident                                                                        |
| # VA telehealth visits                                                                                  |                                                                                                         |
| # VA in-person outpatient visits                                                                        |                                                                                                         |
| # VA community care outpatient visits                                                                   |                                                                                                         |
| # VA admissions                                                                                         | # admissions (VA + non-VA)                                                                              |
|                                                                                                         | # VA primary care visits                                                                                |
|                                                                                                         | # VA specialty care visits                                                                              |
|                                                                                                         | # VA mental health care visits                                                                          |



|                                                     |                                                |
|-----------------------------------------------------|------------------------------------------------|
| State of residence                                  | State of residence                             |
| Distance to nearest level 1a complexity VA facility | Distance to nearest VA medical center          |
| Distance to nearest level 1b complexity VA facility |                                                |
| Distance to nearest level 1c complexity VA facility |                                                |
| Distance to nearest level 2 complexity VA facility  |                                                |
| Distance to nearest level 3 complexity VA facility  |                                                |
| Distance to nearest level CBOC                      |                                                |
| Rurality of residence                               | Rurality of residence (urban, rural)           |
| Vaccinated for SARS-CoV-2 (January-April 2021)      | Vaccinated for SARS-CoV-2 (January-April 2021) |
| Medicare enrolled (none, A only, A+B, A+B+D, MA)    |                                                |

<sup>1</sup>Pregnancy indicator variable was constructed from ICD-10 diagnosis codes but was 0 for all patients in both arms of the study cohort.

Abbreviations: CAN: Care Assessment Need; CDC: Centers for Disease Control and Prevention; COPD: chronic obstructive pulmonary disease; CAD: coronary heart disease; HIV: human immunodeficiency virus; CKD: chronic kidney disease; CHF: congestive heart failure; SUD: substance use disorder; SMI: serious mental illness; PTSD: post-traumatic stress disorder; VA: Veterans Health Administration; CBOC: VA community-based outpatient clinic
